# Supplementary material
Source: publisher figshare collection journal article supplement (https://tandf.figshare.com/ndownloader/files/13687058)
Supplement: Supplementary file 1 [file 13687058]

**Supplementary Information**

Half-sandwich ruthenium(II)-arene complexes: Synthesis, spectroscopic studies, biological properties and molecular modeling

STEFAN NIKOLIĆ, SANJA GRGURIĆ-ŠIPKA, IVANA S. DJORDJEVIĆ, RAHMA DAHMANI, DRAGANA DEKANSKI, SAŠENKA VIDIČEVIĆ, JELENA TOŠIĆ, DRAGANA MITIĆ and SONJA GRUBIŠIĆ*

**Table of contents**

IR spectra Figures S1 and S2

NMR spectra Figures S3-S6

NMR spectra in DMSO during 48 h Figures S7 and S8

NMR spectra in DMSO/D2O Figures S9 and S10

UV-Vis spectra Figures S11 and S12

Mass spectra Figures S13 and S14


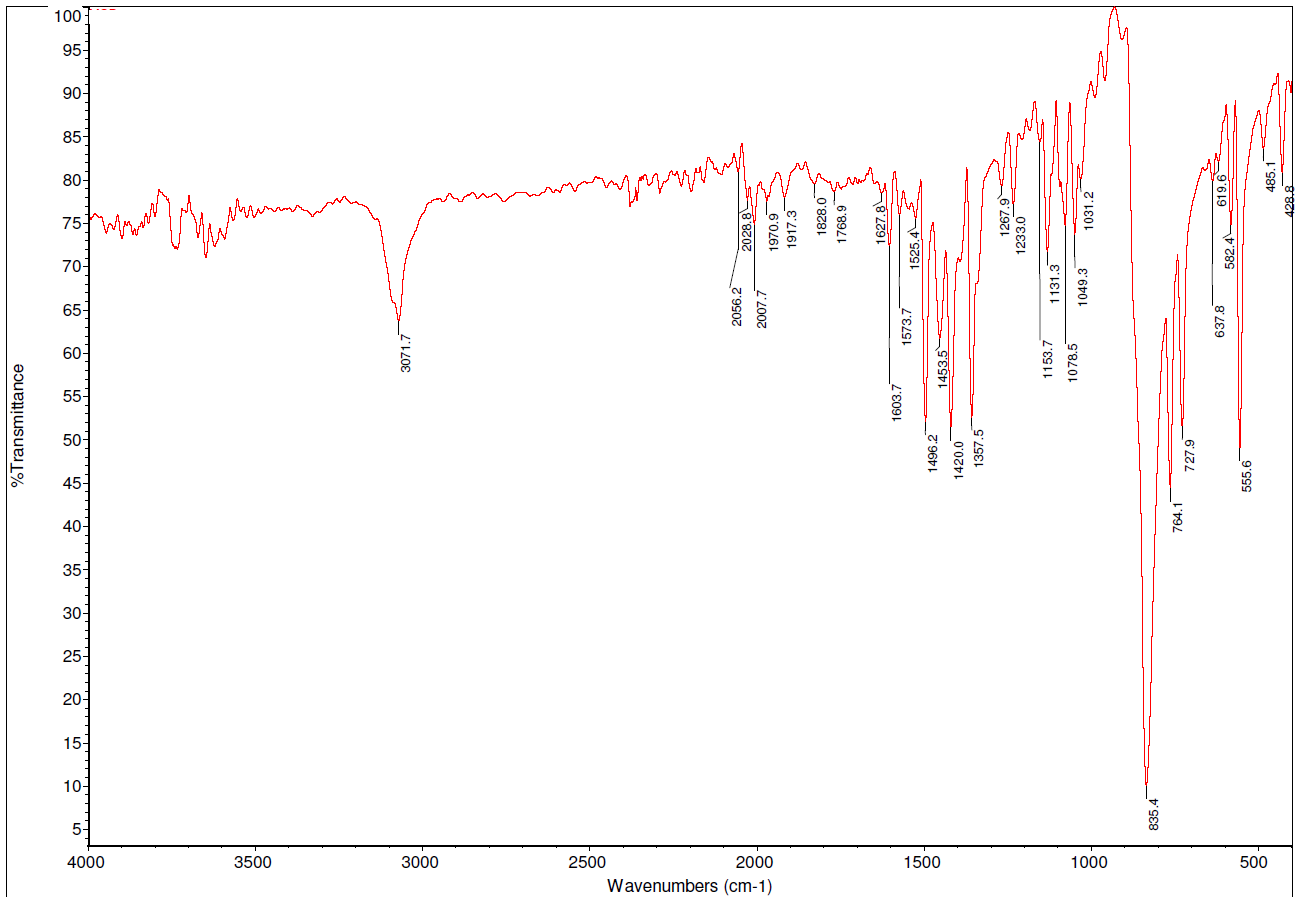


Figure S1. IR spectrum of complex **1**.


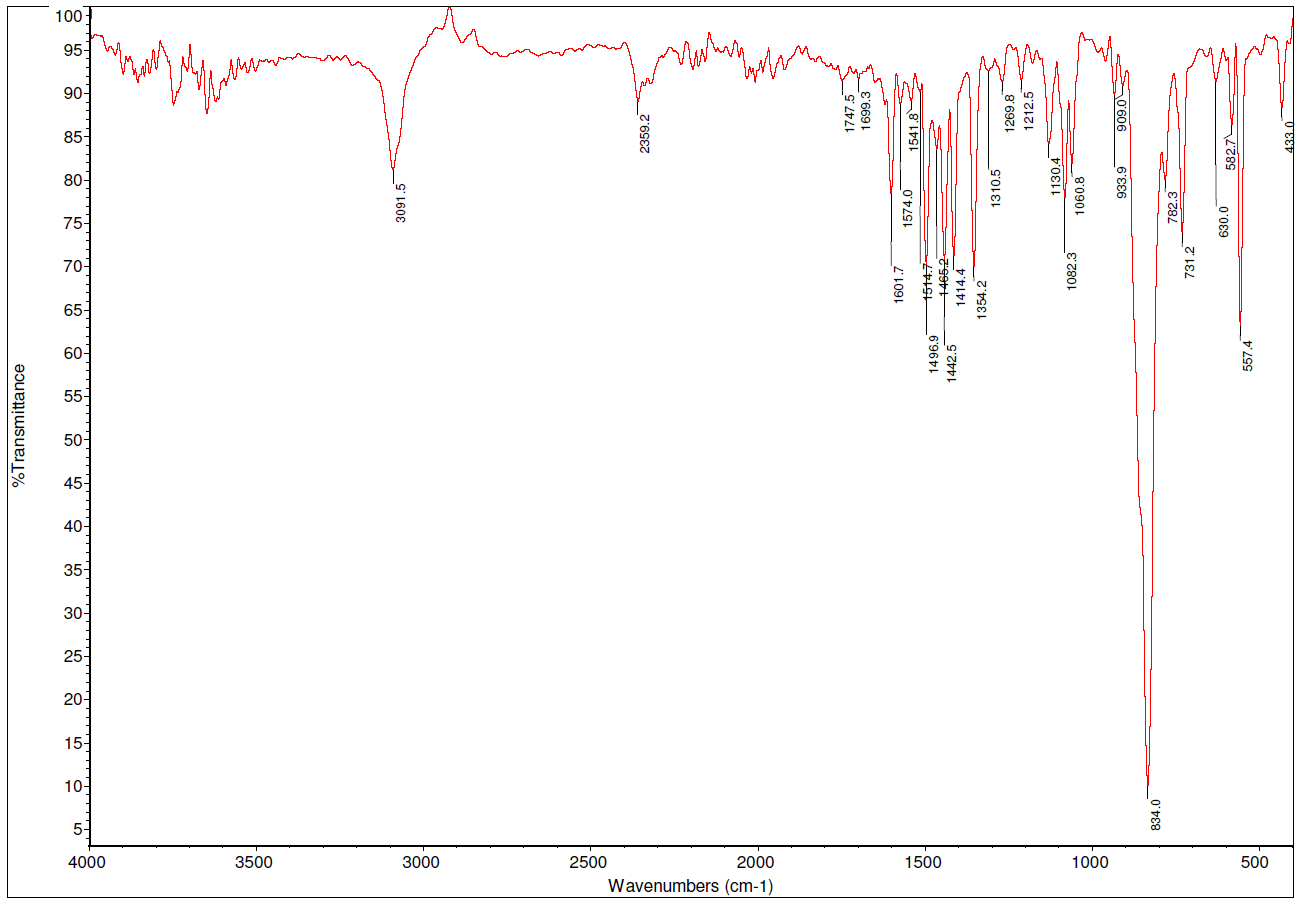


Figure S2. IR spectrum of complex **3**.

**
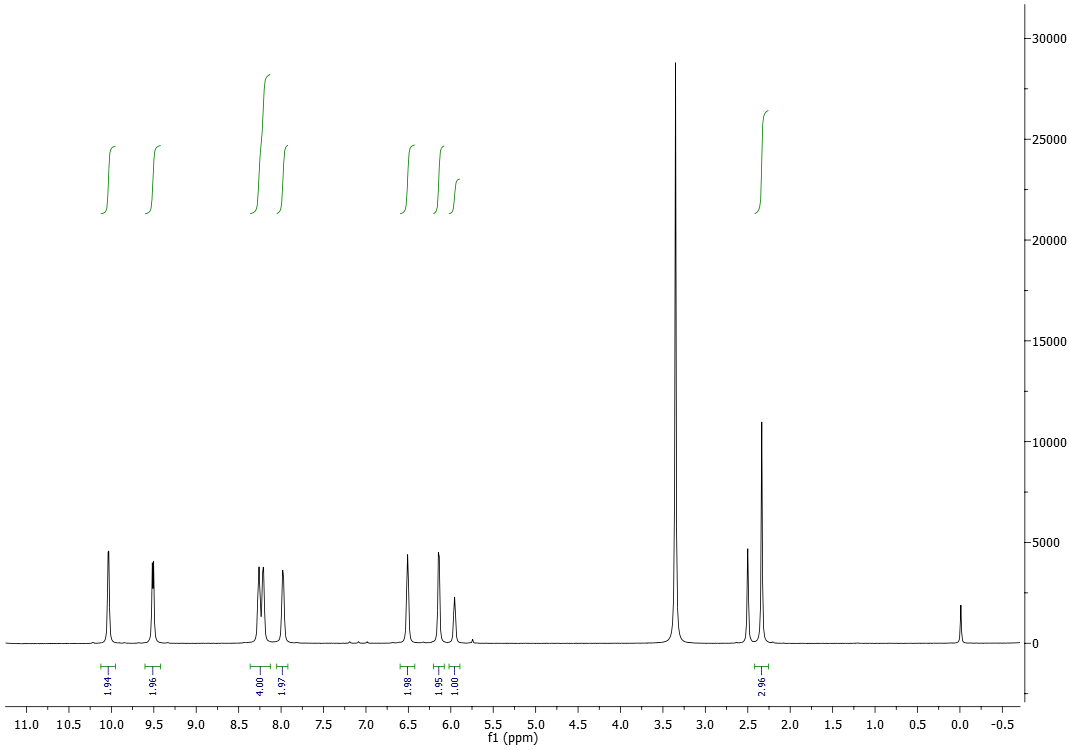
**

Figure S3. 1H NMR (500 MHz, DMSO-d6) spectrum of complex **1**.


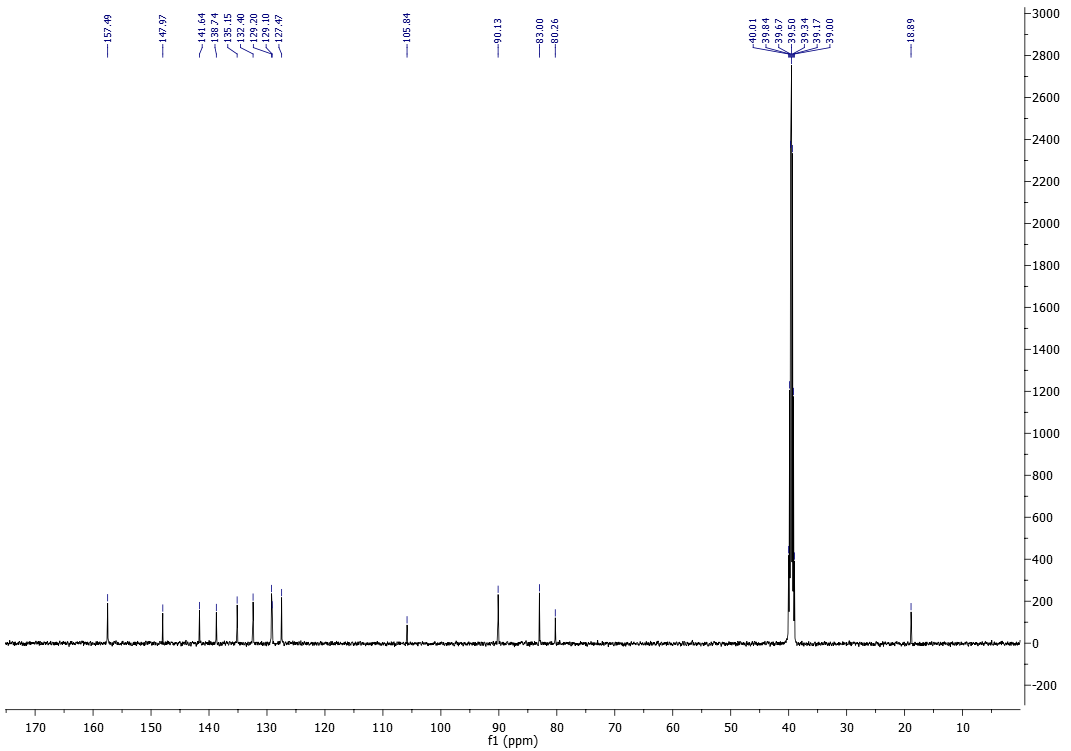


Figure S4. 13C NMR (125 MHz, DMSO-d6) spectrum of complex **1**.


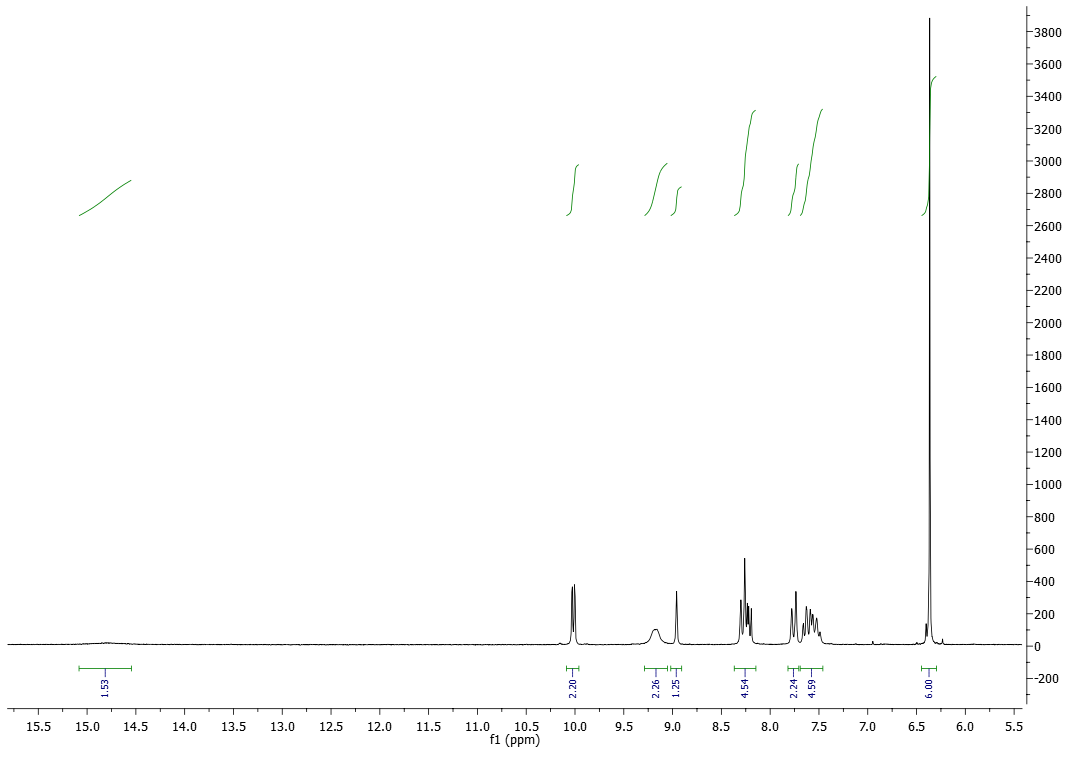


Figure S5. 1H NMR (200 MHz, DMSO-d6) spectrum of complex **3**.


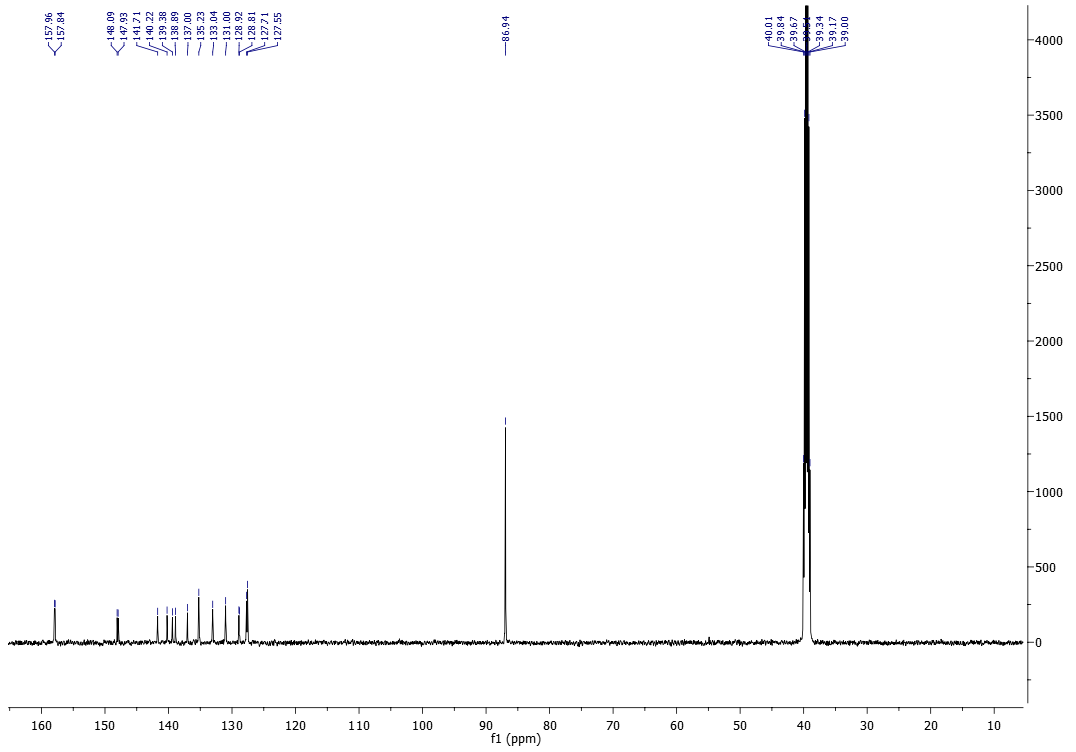


Figure S6. 13C NMR (50 MHz, DMSO-d6) spectrum of complex **3**.


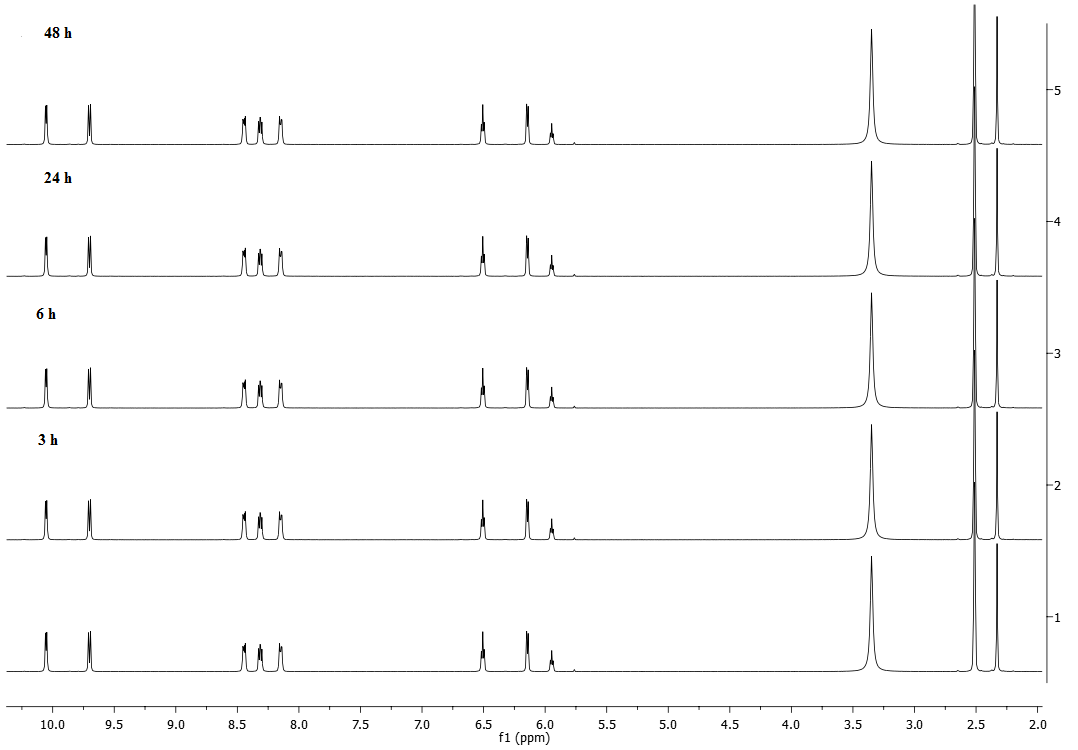


Figure S7. 1H NMR (500 MHz, DMSO-d6) spectra of complex **1** during 48 h.


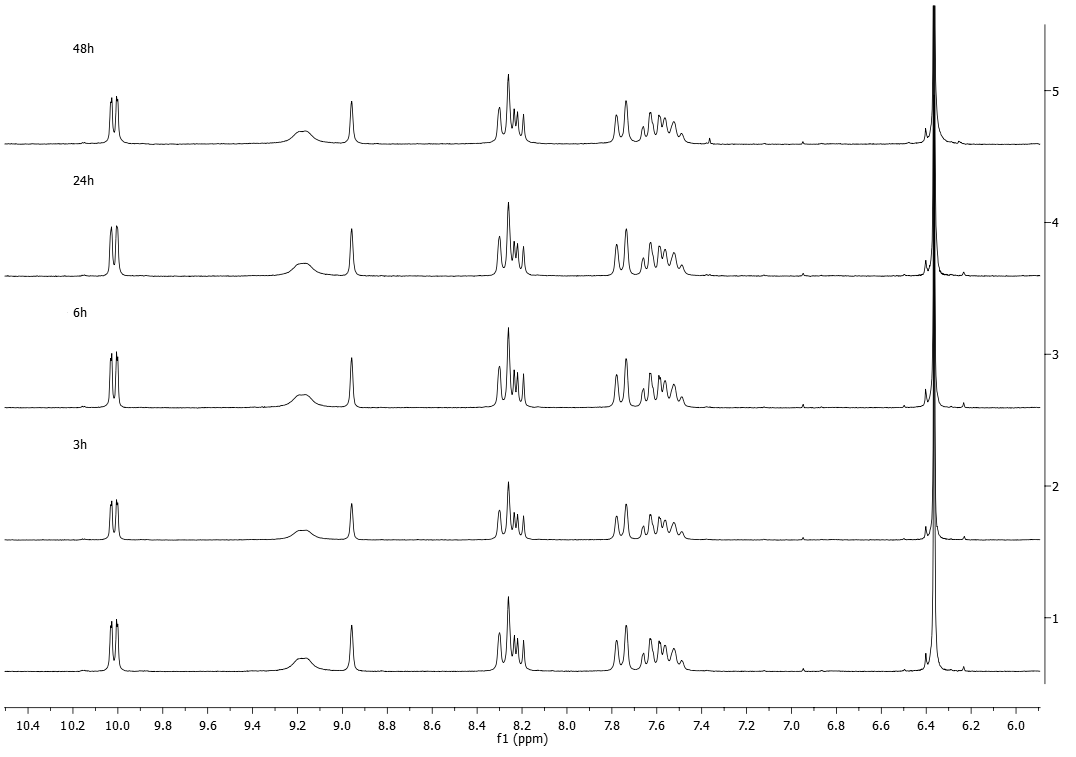


Figure S8. 1H NMR (500 MHz, DMSO-d6) spectra of complex **3** during 48 h.


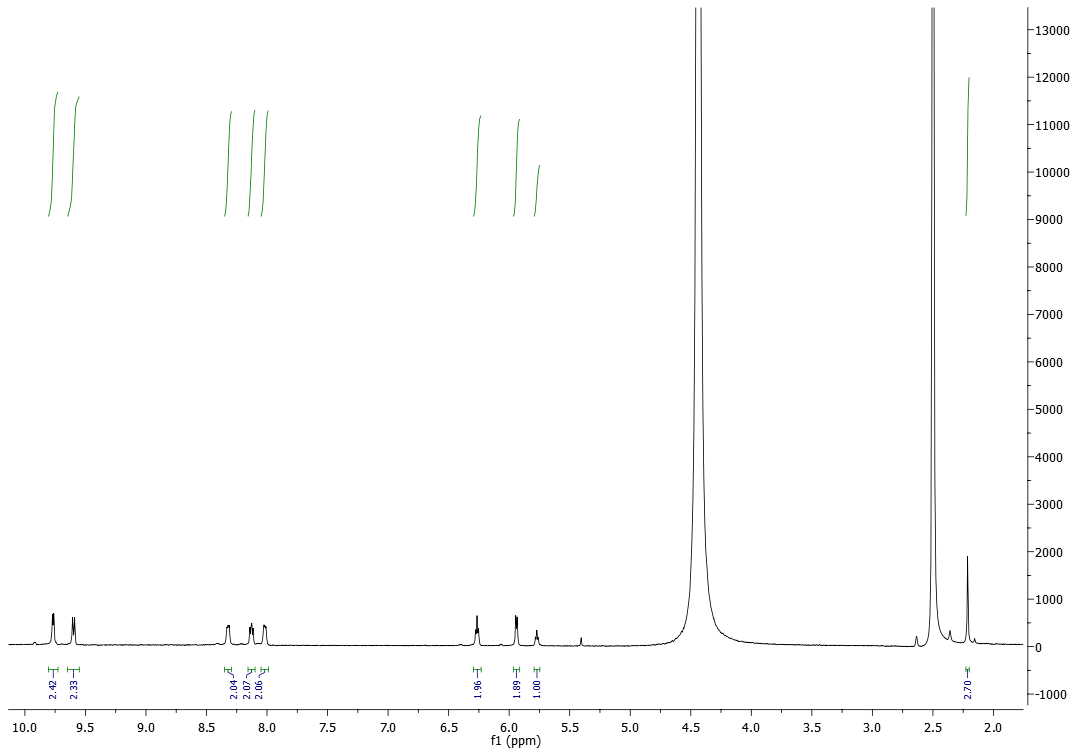


Figure S9. 1H NMR (500 MHz, DMSO-d6/D2O) spectra of complex **1**.


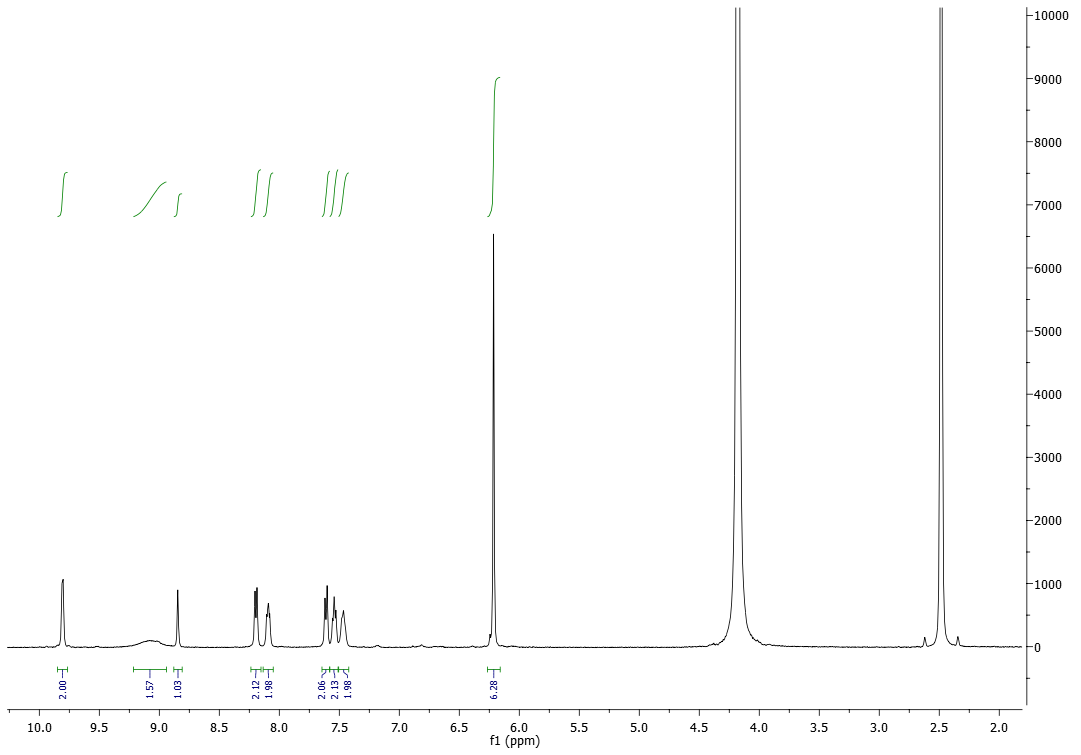


Figure S10. 1H NMR (500 MHz, DMSO-d6/D2O) spectra of complex **3**.


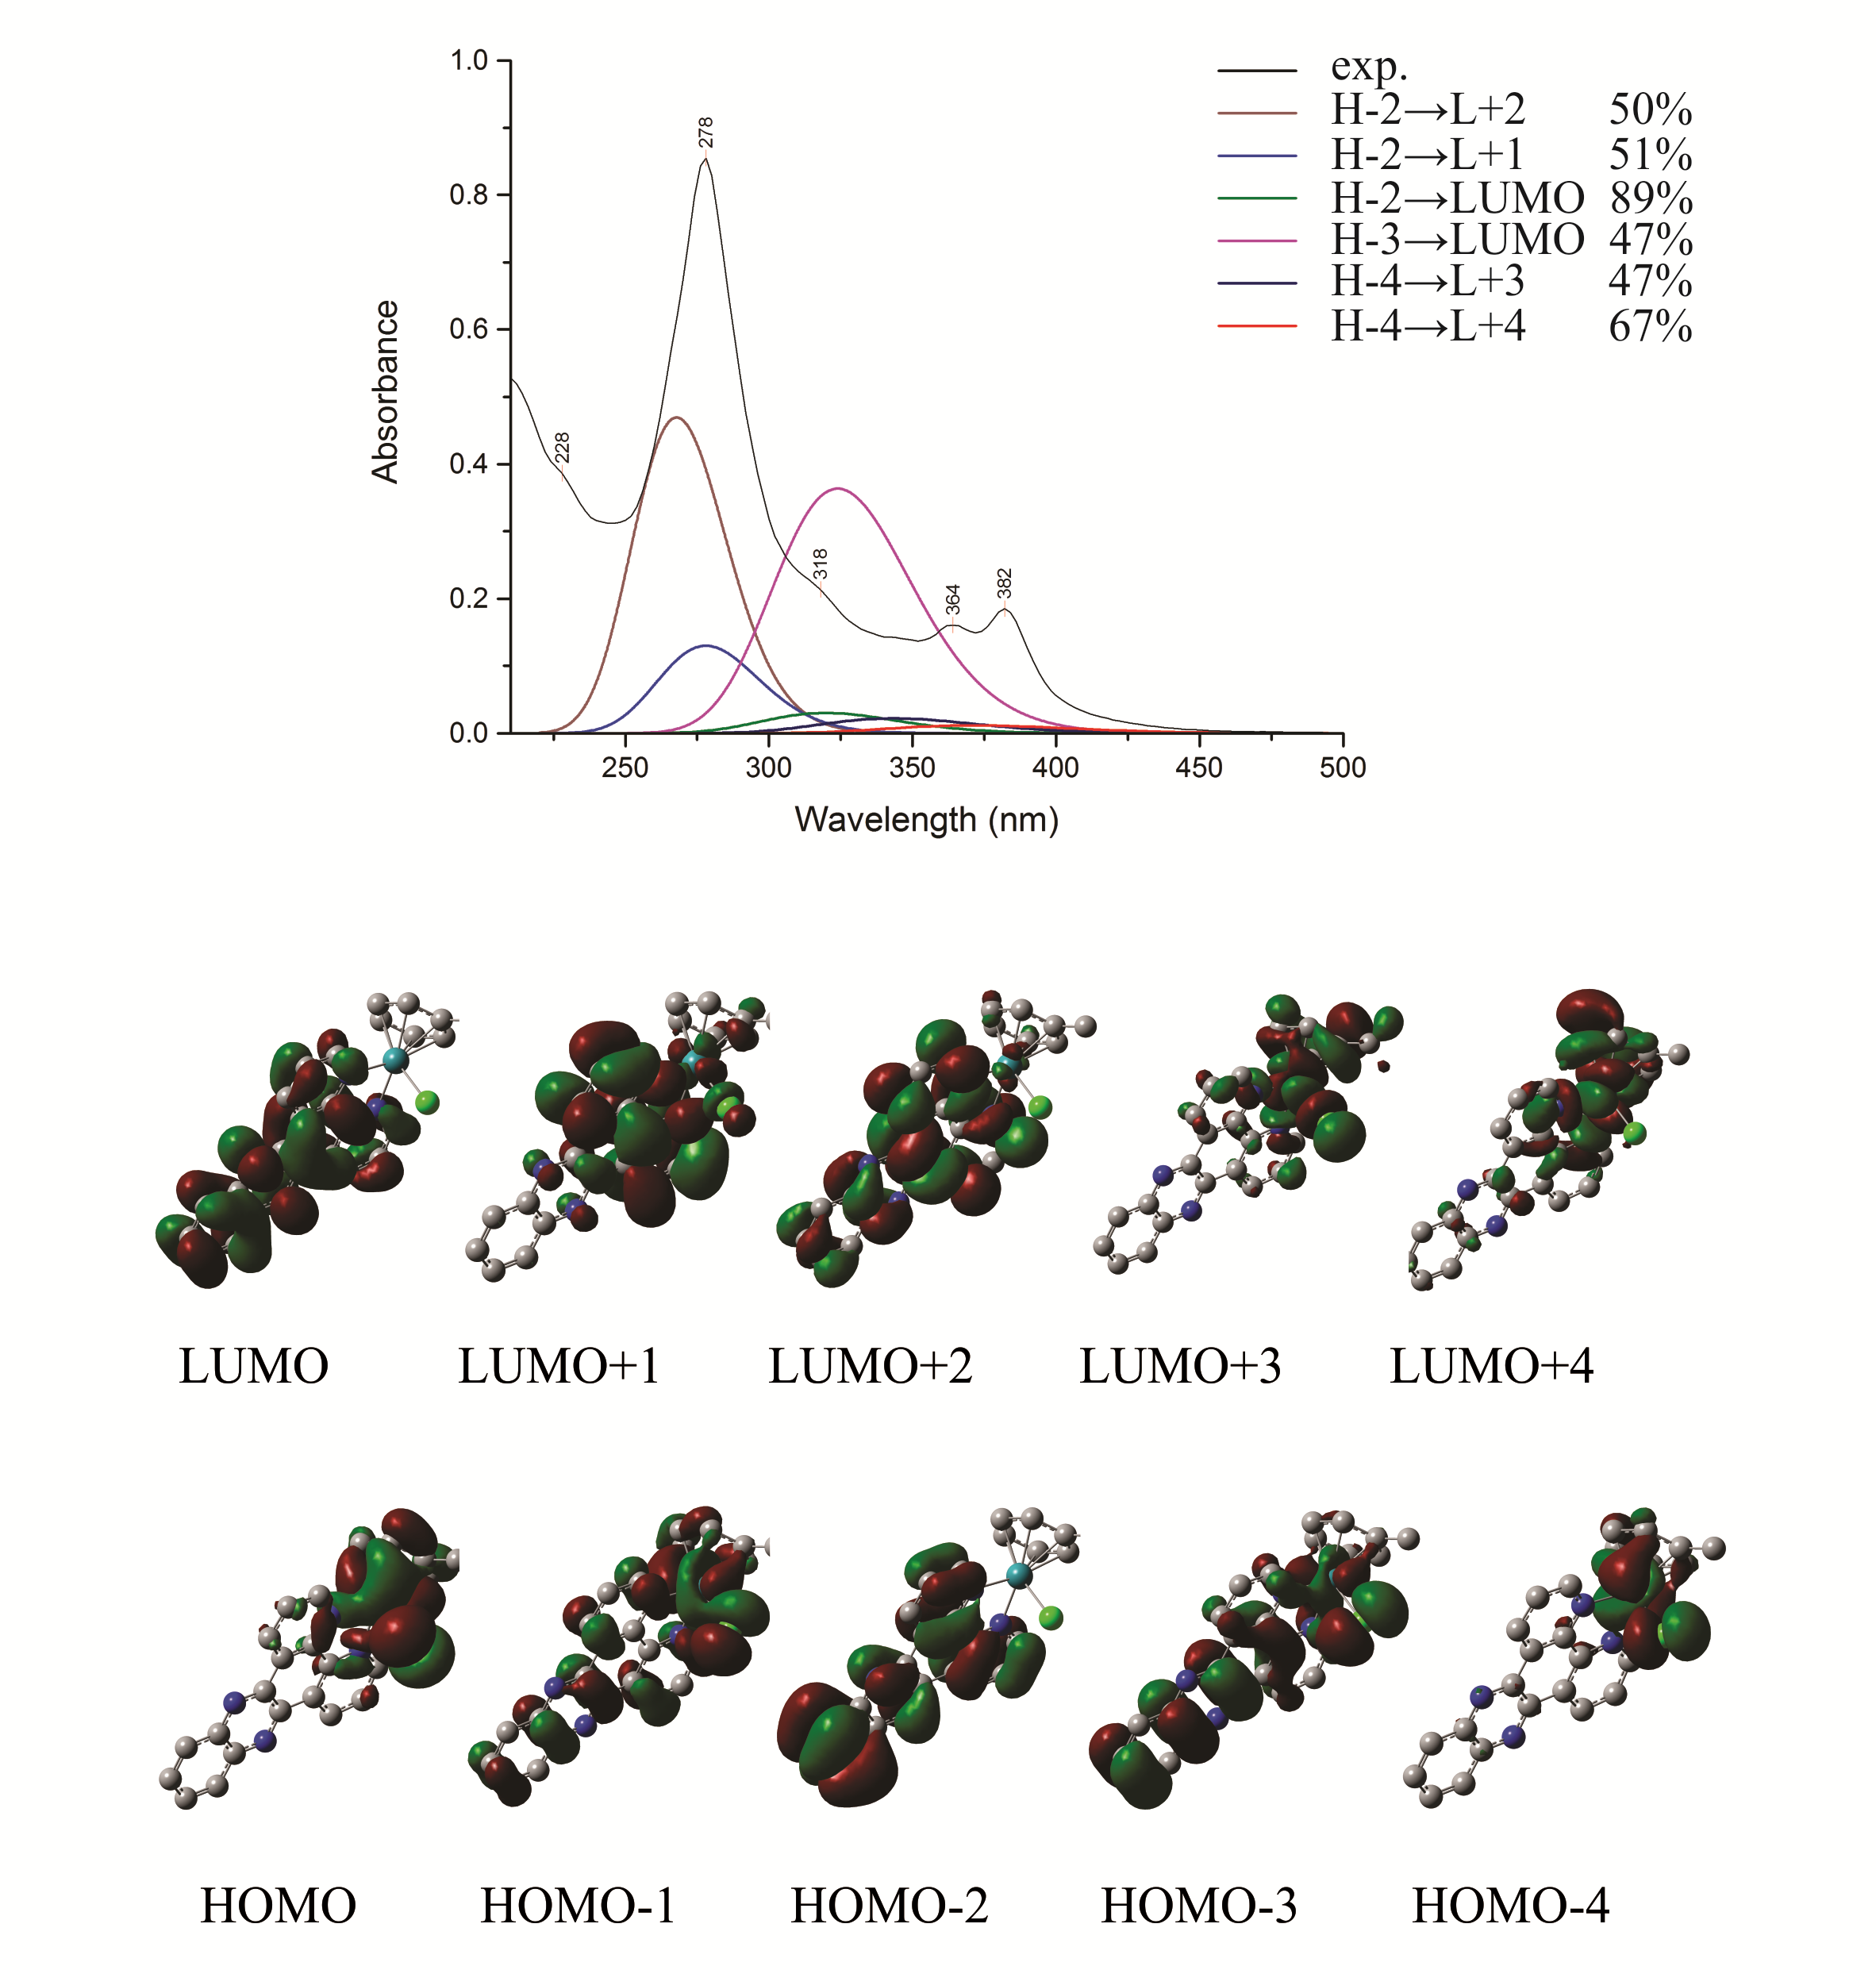


Figure S11. Experimental UV-Vis spectra, calculated the electronic transitions and molecular orbitals of complex **1**. The black line with marked numbers represent experimental UV-Vis curve; Colored curves represent calculated transitions where H-2, H-3, H-4 correspond to HOMO-2, HOMO-3, HOMO-4 while L+1, L+2, L+3, L+4 stand for LUMO+1, LUMO+2, LUMO+3, LUMO+4.


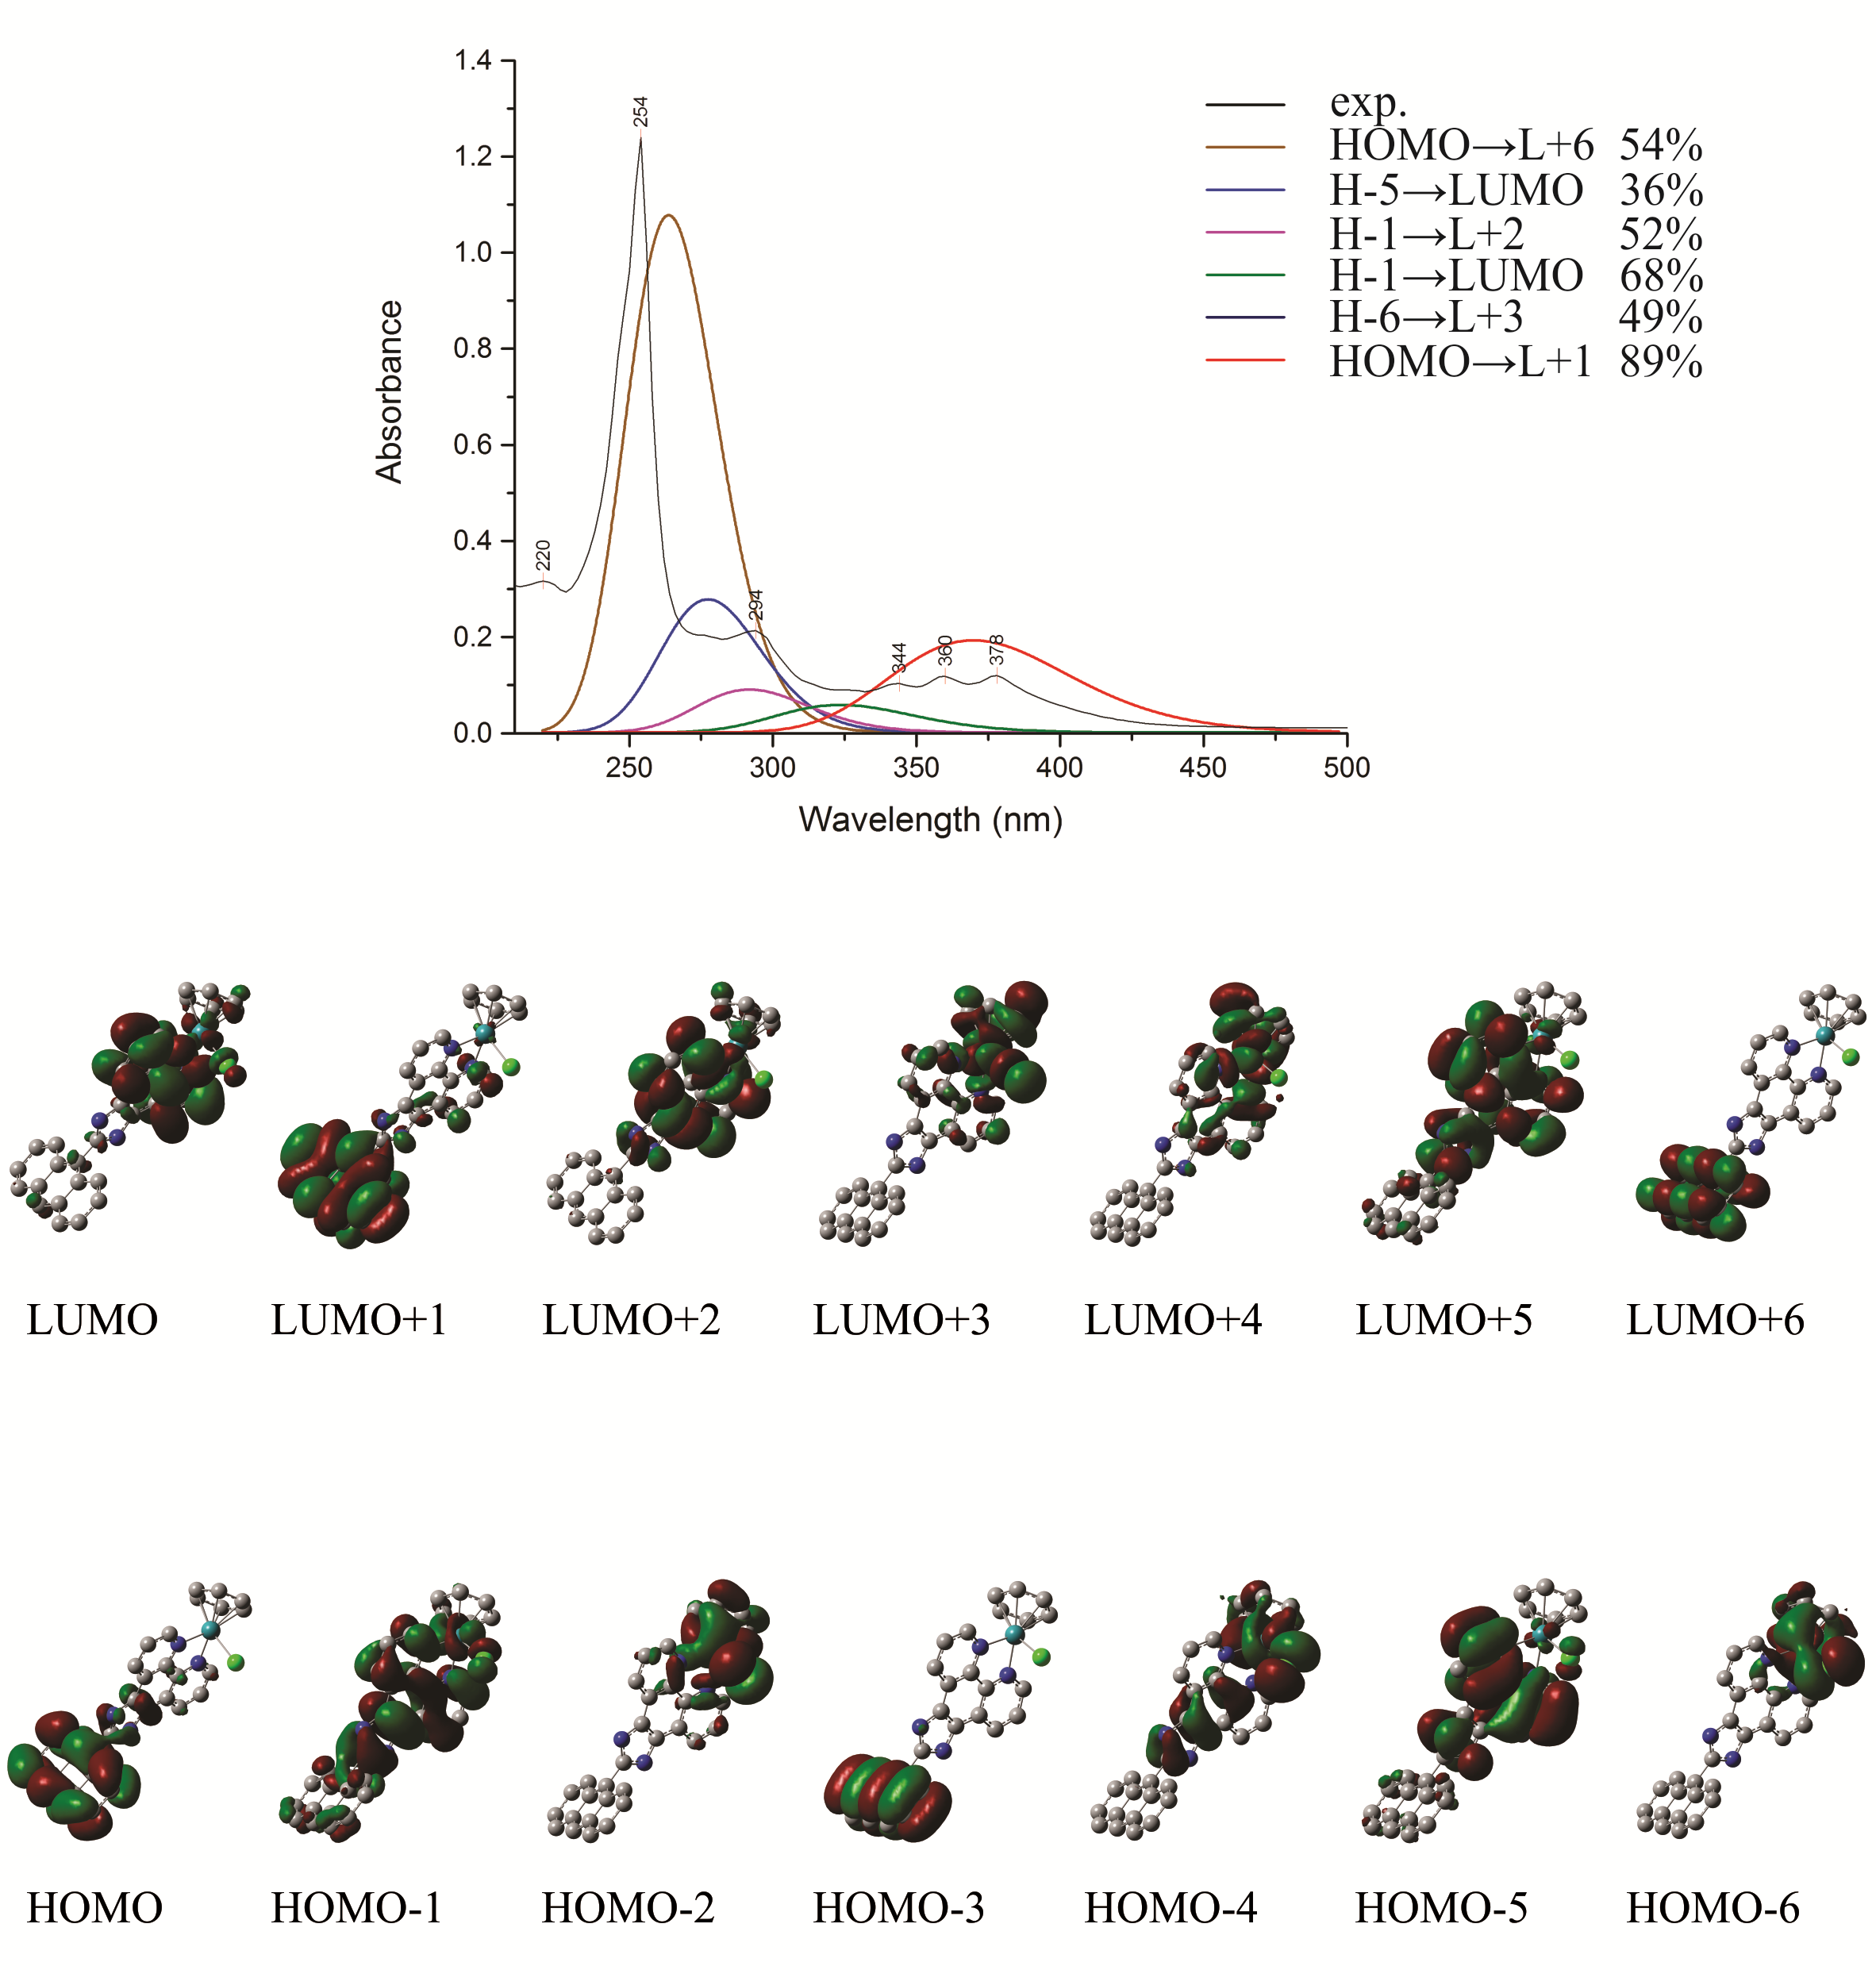


Figure S12. Experimental UV-Vis spectra, calculated the electronic transitions and molecular orbitals of complex **3**. The black line with marked numbers represent experimental UV-Vis curve; Colored curves represent calculated transitions where H-1, H-5, H-6 correspond to HOMO-1, HOMO-5, HOMO-6 while L+1, L+2, L+3, L+6 stand for LUMO+1, LUMO+2, LUMO+3, LUMO+6.


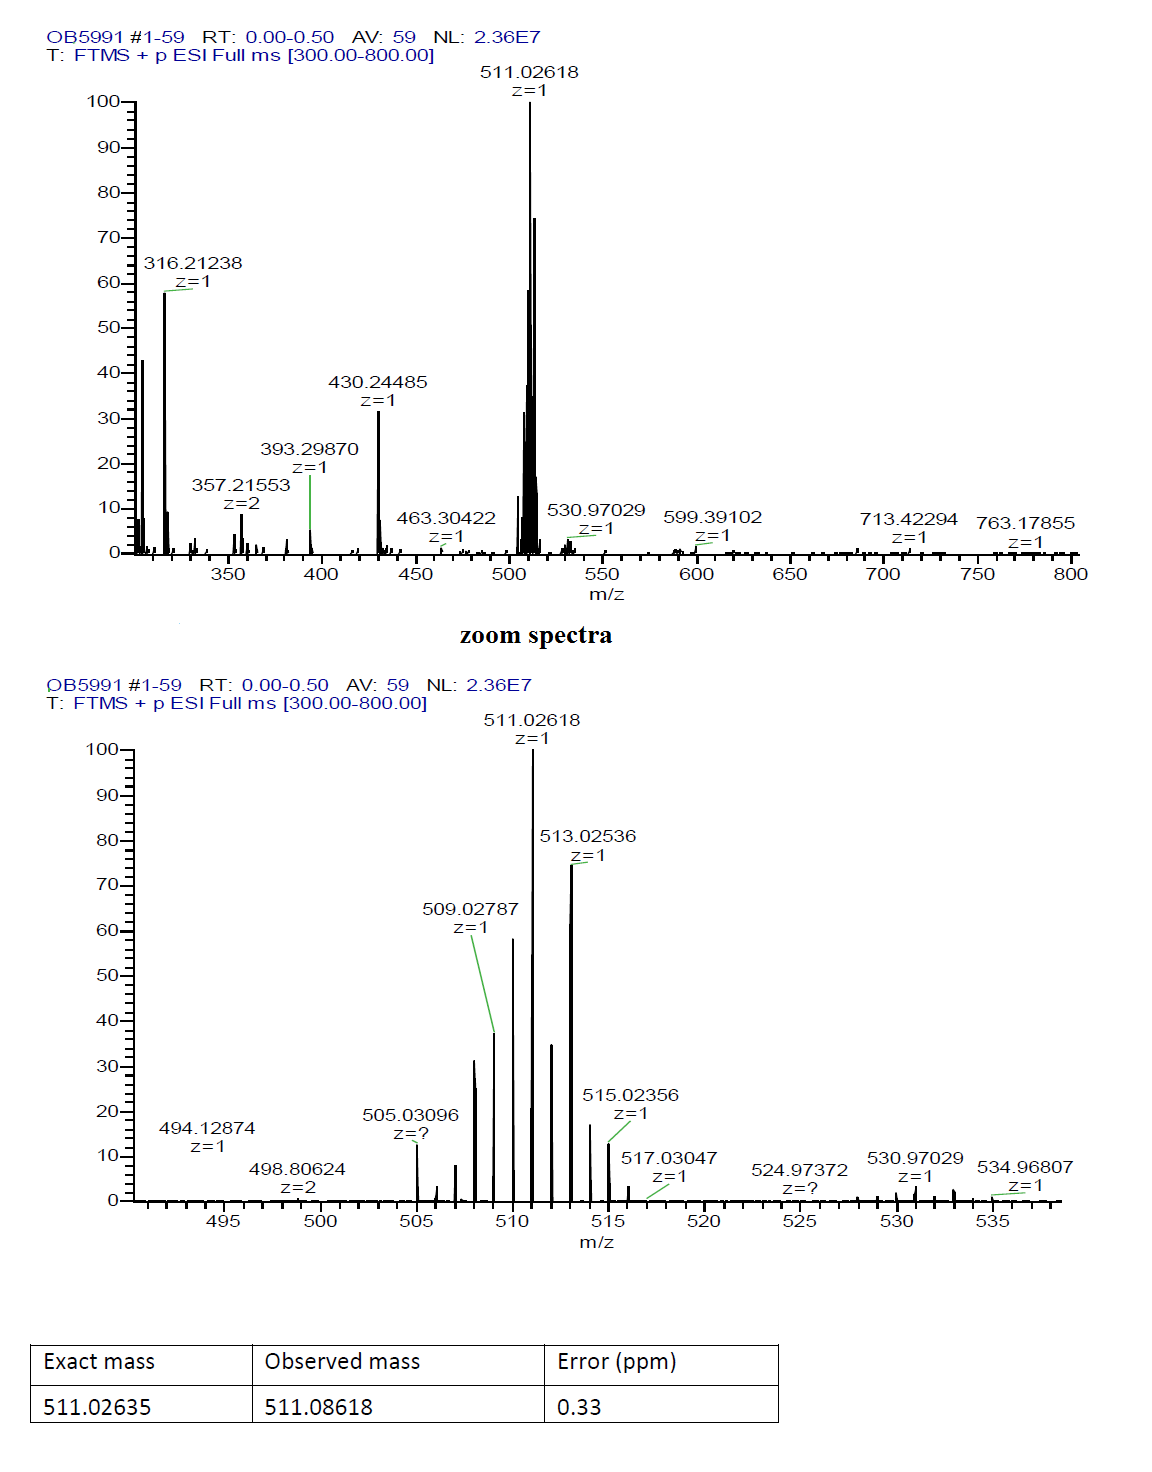


Figure S13. Mass spectra of complex **1**.


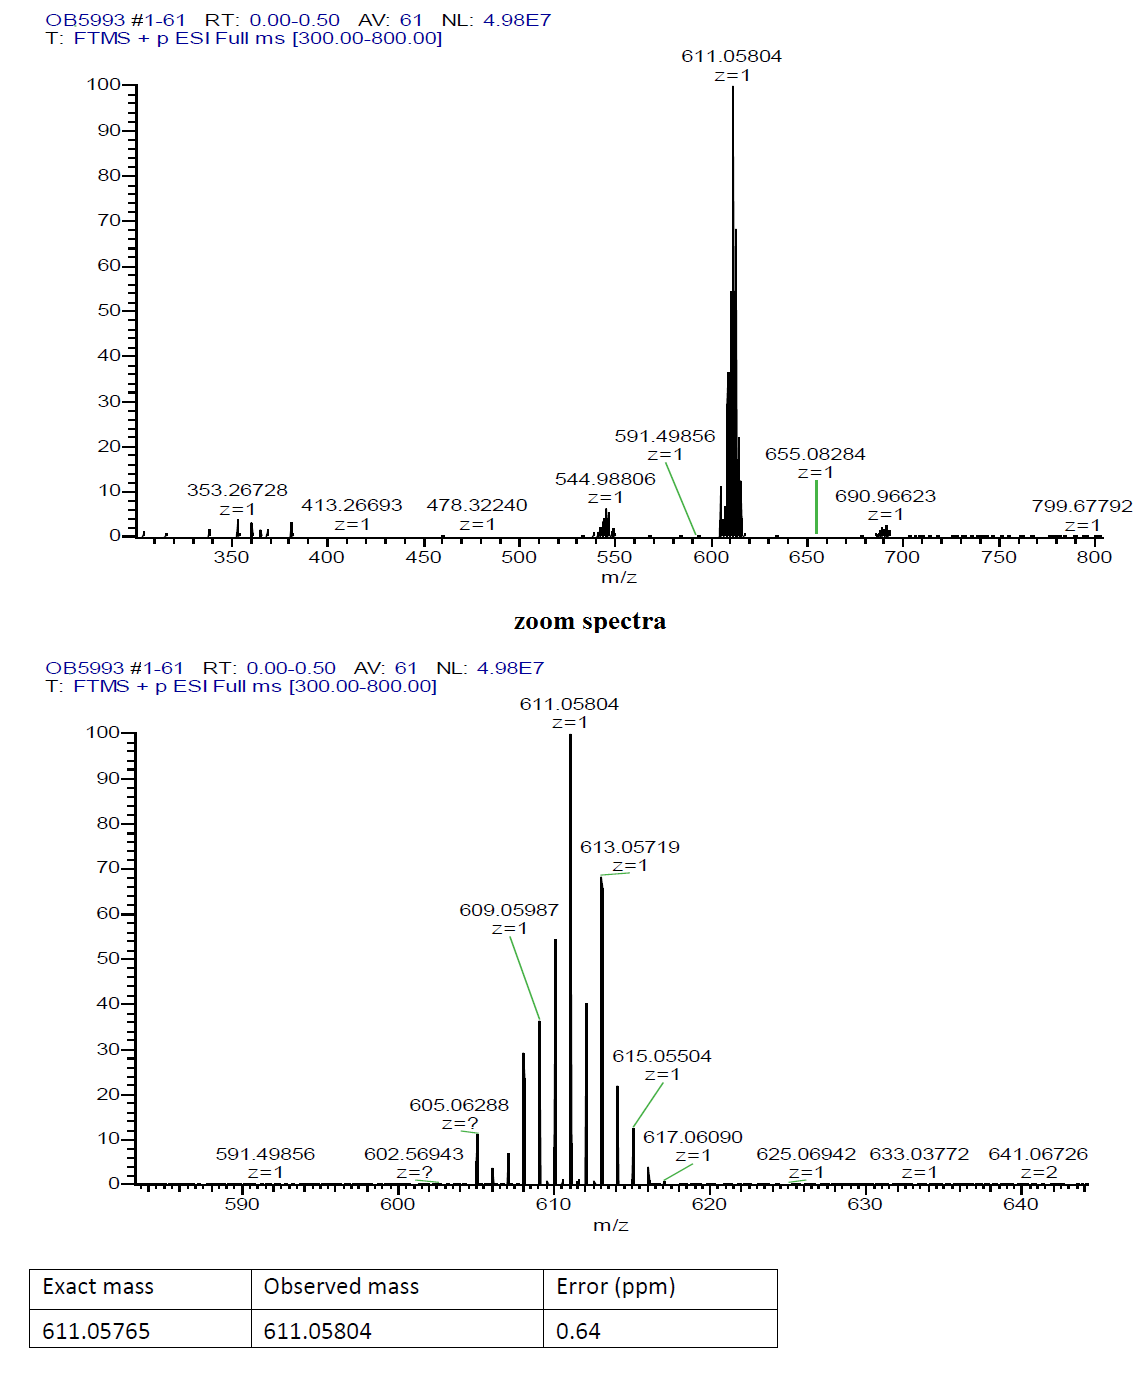


Figure S14. Mass spectra of complex **3**.
